# Supplementary material for: Monodispersed or narrow-dispersed melamine–formaldehyde resin polymer colloidal spheres: preparation, size-control, modification, bioconjugation and particle formation mechanism
Source: Royal Society of Chemistry journal article supplement (doi:10.1039/c2tb00043a), 2012-10-02
Supplement: c2tb00043a.pdf [file c2tb00043a.pdf]

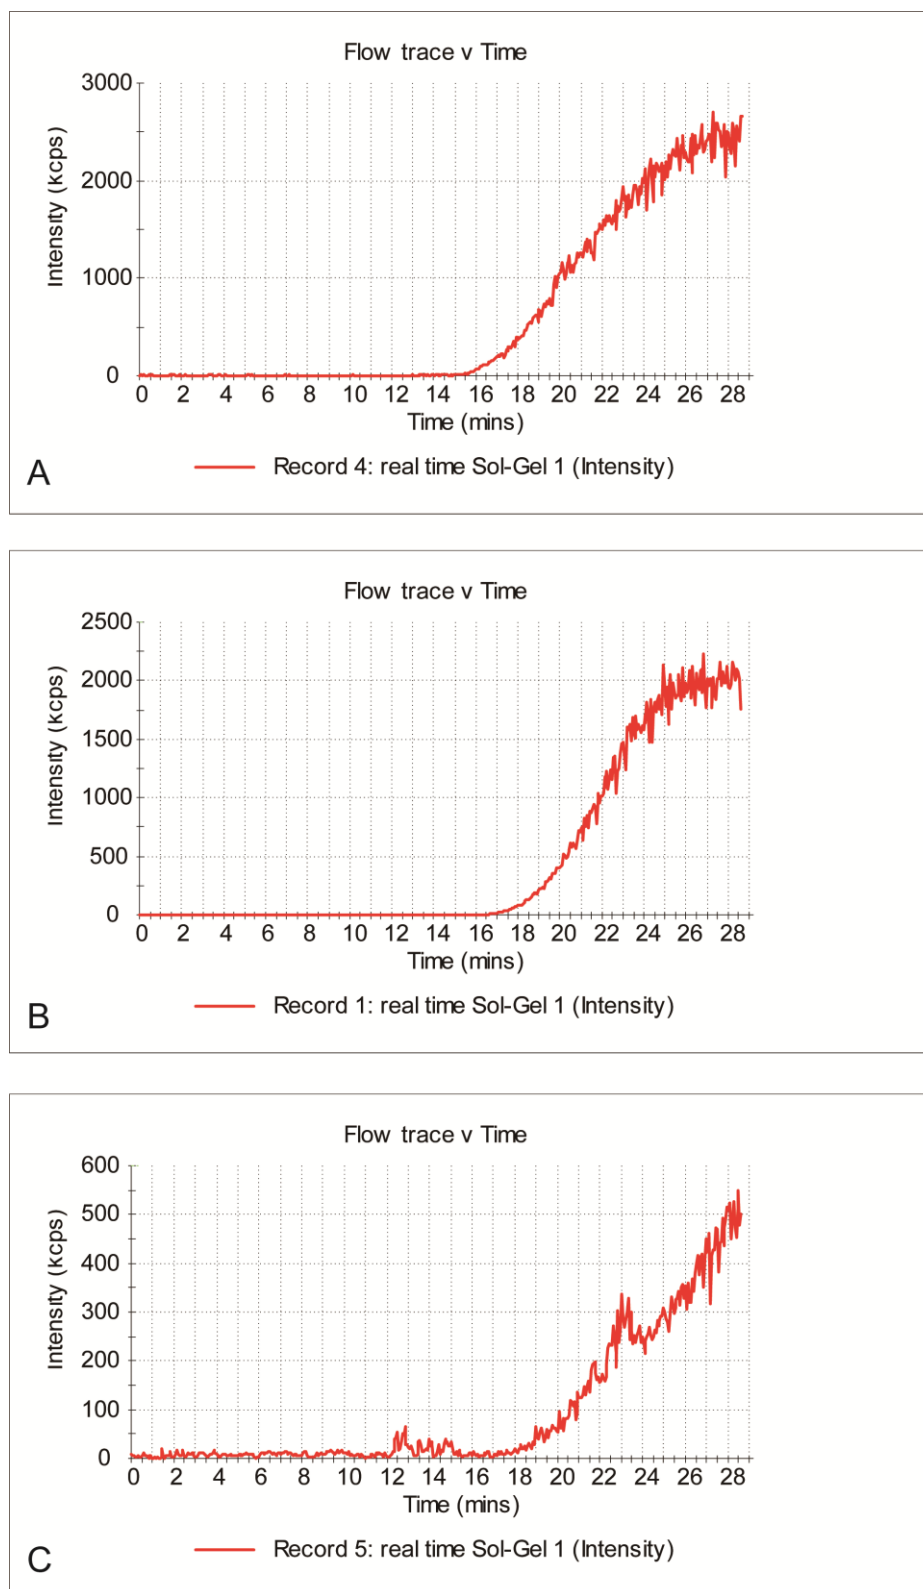

**Fig. S1.** DLS intensity versus time curves of the MF sol-gel processes, with MF prepolymer concentration of 63 mg/ml (A), 21 mg/ml (B) and 16 mg/ml (C).

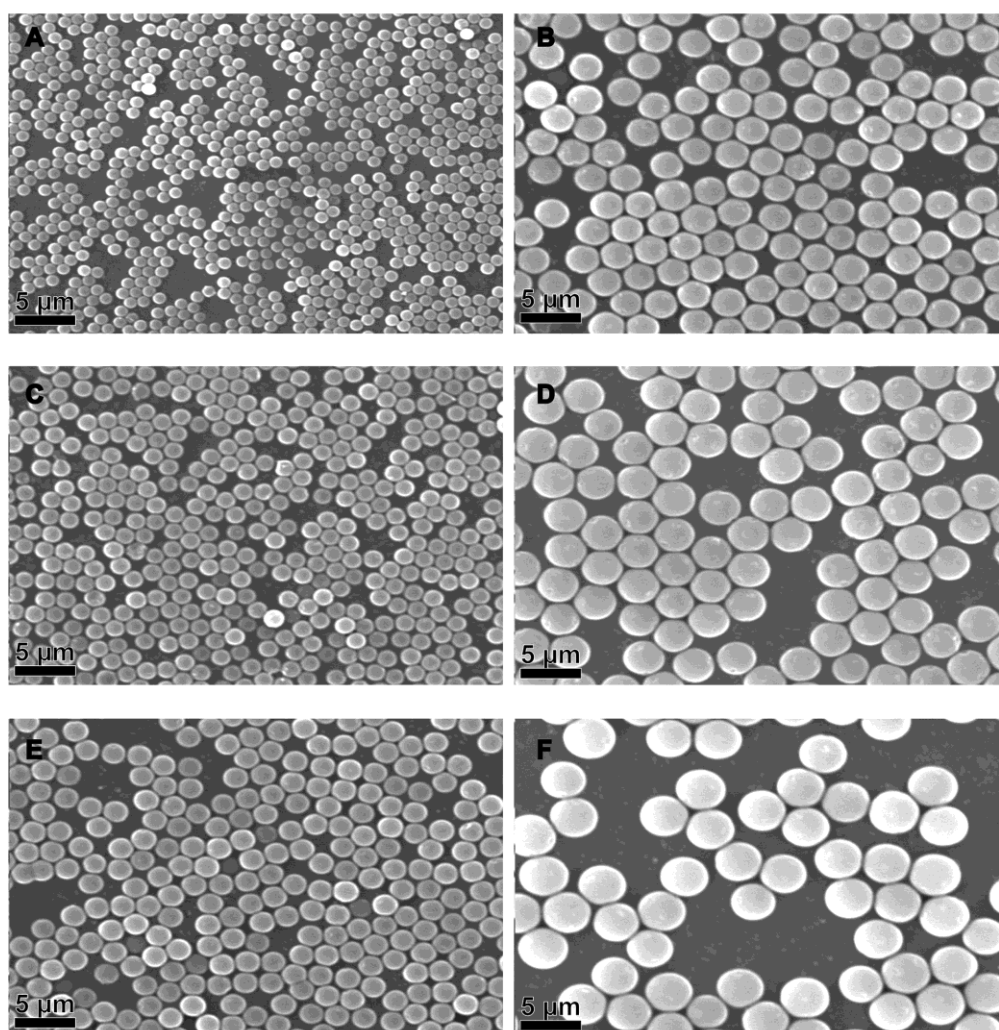

**Fig. S2.** A-F, SEM images of MF colloidal spheres with MF prepolymer concentration of 21, 25, 32, 50, 63 and 84 mg/ml.

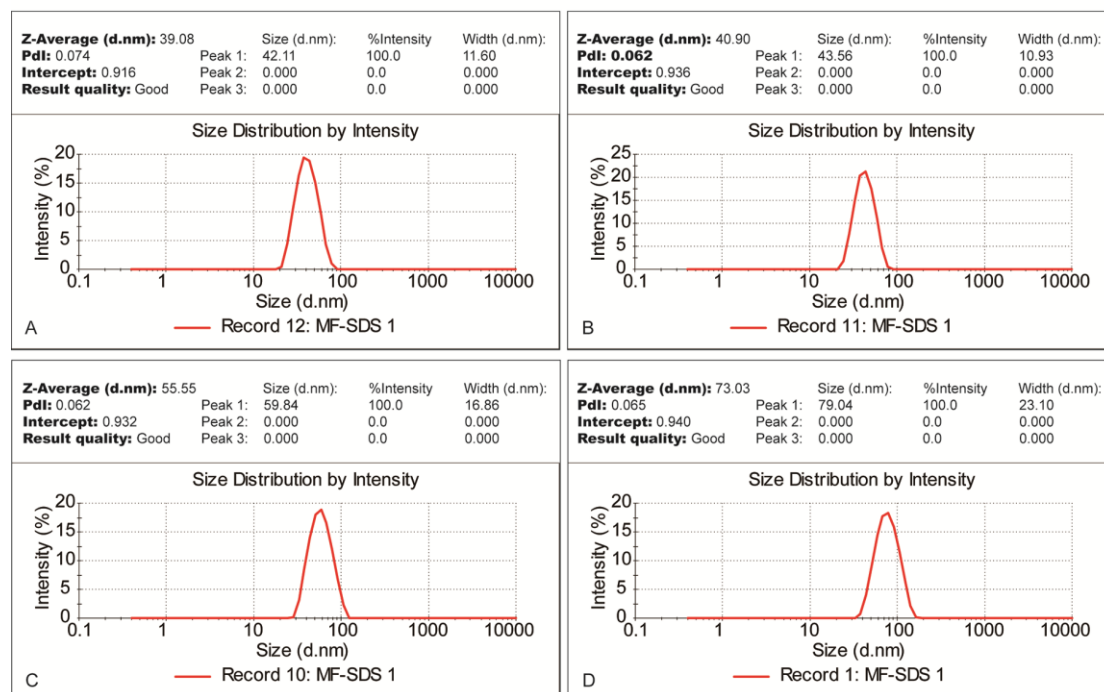

**Fig.S3.** Size distribution diagrams of the produced colloidal spheres with MF prepolymer concentration of 10.5 mg/ml and SDS concentration of 1.7, 1.8, 2.0, 2.2, 2.3, 2.5 and 2.7 mg/ml.
